# Supplementary material for: Zwitterionic polymer-derived nitrogen and sulfur co-doped carbon-coated Na3V2(PO4)2F3 as a cathode material for sodium ion battery energy storage
Source: Royal Society of Chemistry journal article supplement (doi:10.1039/d1nj03779j), 2021-01-01
Supplement: d1nj03779j1.pdf [file d1nj03779j1.pdf]

**Supporting Information for**

**Zwitterionic polymer-derived nitrogen and sulfur co-doped  
carbon-coated Na<sub>3</sub>V<sub>2</sub>(PO<sub>4</sub>)<sub>2</sub>F<sub>3</sub> as a cathode material for  
sodium ion battery energy storage**

Tianyi Lu, Xiaobo Yu, Xiaokai Li, Jiawei Qi, Shu Huang, Zu Man, Haitao Zhuo\*

College of Chemistry and Environmental Engineering, Shenzhen University,  
Shenzhen, 518060, P. R. China

\* Corresponding author: [haitaozhuo@163.com](mailto:haitaozhuo@163.com)

Number of pages: 5

Number of figures: 5

**TABLE OF CONTENT**

1. Supplementary Figures

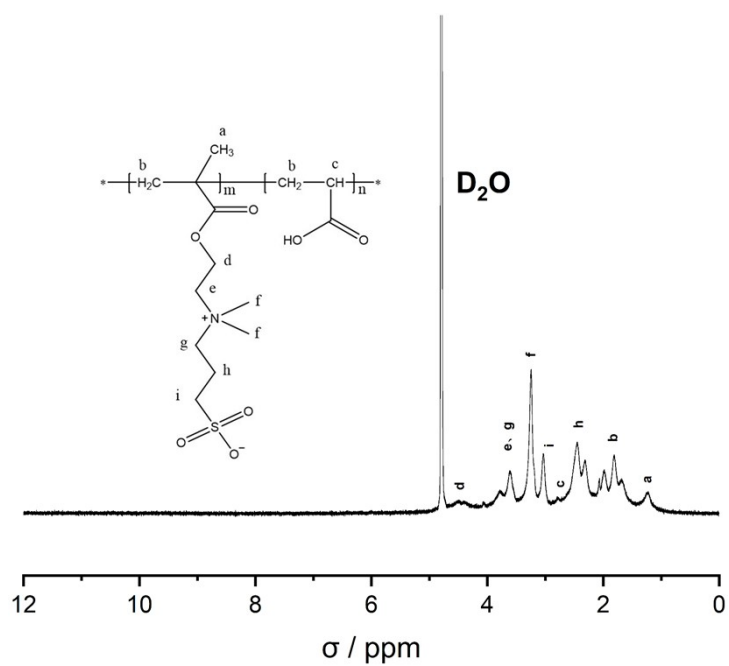

**Fig. S1** <sup>1</sup>H-NMR of DMAPS-co-AA

**Fig. S1** is the <sup>1</sup>H-NMR diagram of DMAPS-co-AA, in which each hydrogen is assigned as follows: 4.49 (d, -OCH<sub>2</sub>); 3.60、3.79 (e、g, -NCH<sub>2</sub>); 3.25 (f, -N(CH<sub>3</sub>)<sub>2</sub>); 3.03 (i, -CH<sub>2</sub>-SO<sub>3</sub><sup>-</sup>); 2.48、2.31 (c、h, -CH<sub>2</sub>-C-SO<sub>3</sub><sup>-</sup>); 1.99、1.81、1.67 (b, -CH<sub>2</sub>); 1.23 (a, -CH<sub>3</sub>);

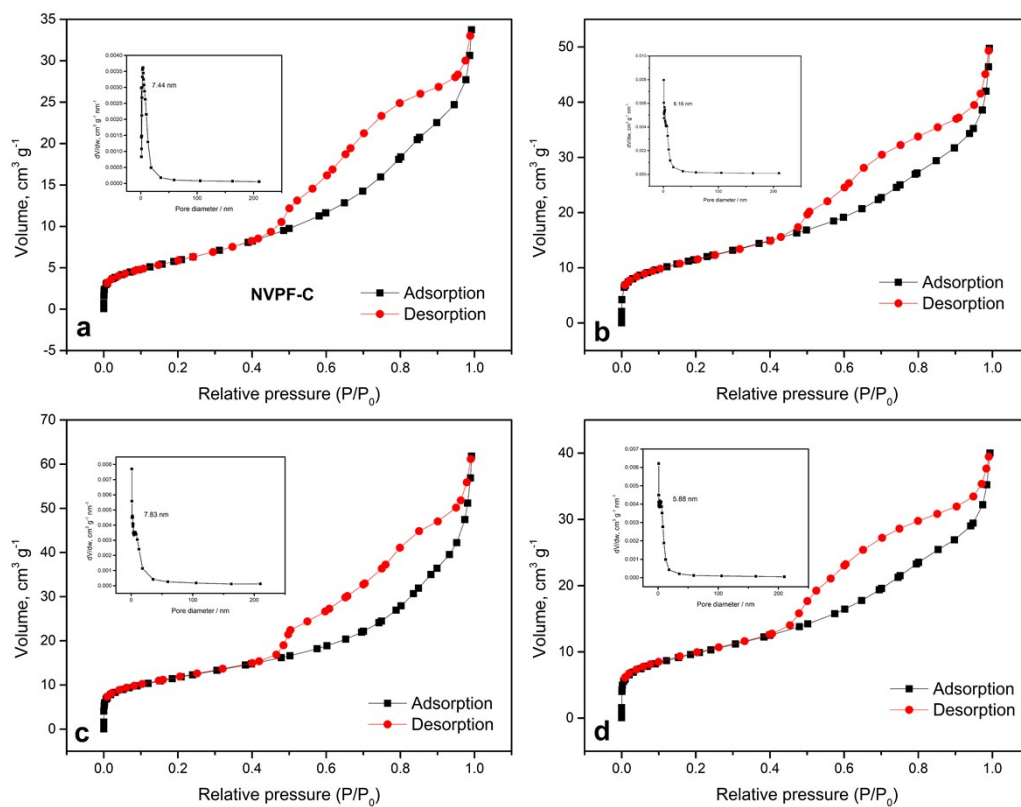

**Fig. S2**  $N_2$  adsorption-desorption isotherms and corresponding BJH pore-size distribution curve (the inset) of all samples.

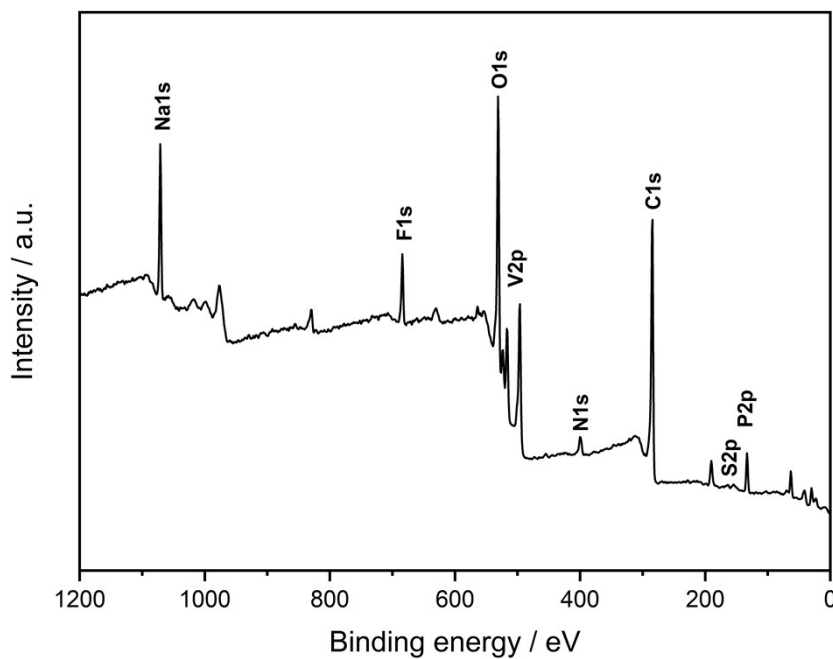

**Fig. S3** Full XPS spectra of NVPF-NSC-2.

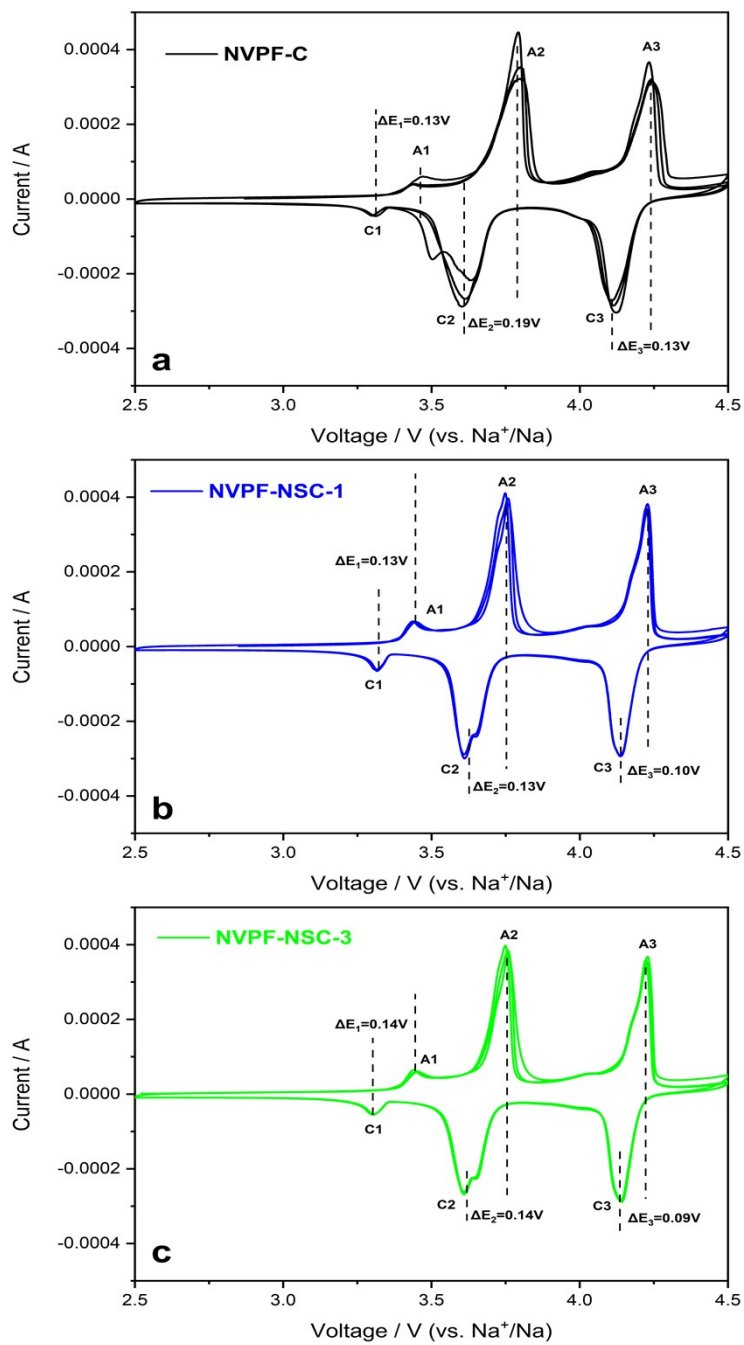

**Fig. S4** CV curves for the first three cycles of NVPF-C、NVPF-NSC-1、NVPF-NSC-3, respectively.

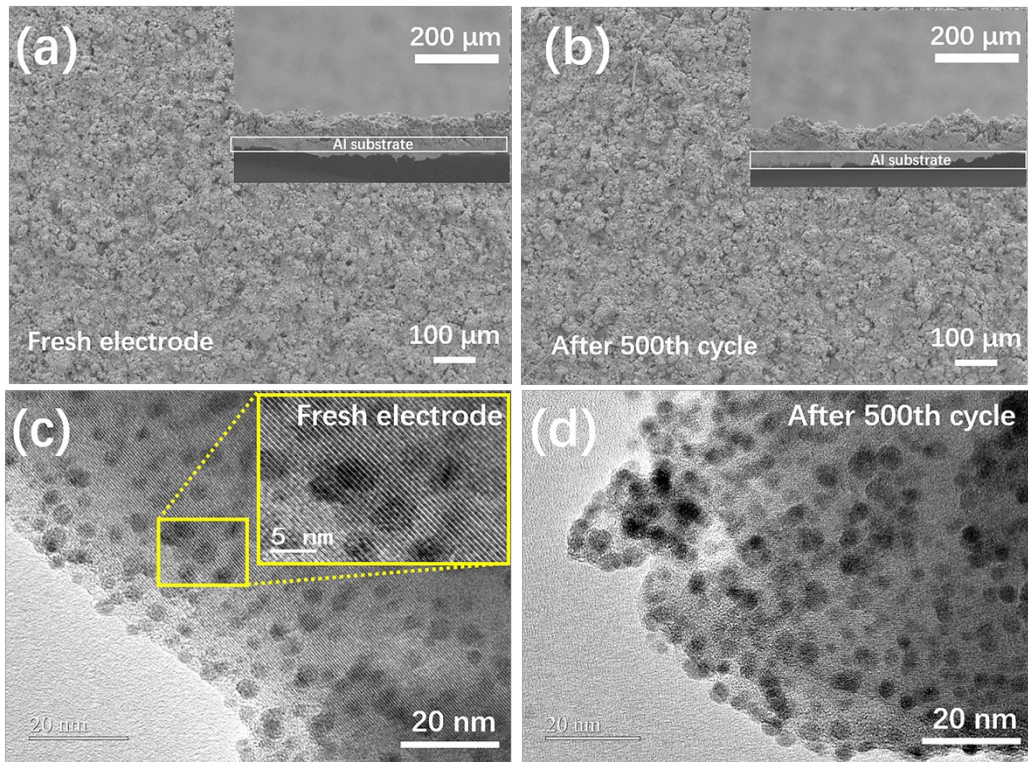

**Fig. S5** SEM and TEM images of NVPF-NSC-2 material under high current cycle.
